# Supplementary material for: Association of epicardial adipose tissue volume with increased risk of hemodynamically significant coronary artery disease
Source: PubMed Central journal article supplement — Quant Imaging Med Surg. 2023 Feb 10;13(4):2582–93. doi: 10.21037/qims-22-709 (PMC10102765; doi:10.21037/qims-22-709), 2023-02-10
Supplement: qims-13-04-2582-supplementary.pdf [file qims-13-04-2582-supplementary.pdf]

**Table S1** Characteristics of the different hypertension subgroups

|                                         | Hypertension (n=113) | Without hypertension (n=51) | P value |
|-----------------------------------------|----------------------|-----------------------------|---------|
| Male, n (%)                             | 73 (64.6)            | 38 (74.5)                   | 0.21    |
| Age (years, mean $\pm$ SD)              | 62.55 $\pm$ 9.57     | 58.82 $\pm$ 10.37           | 0.05    |
| BMI (kg/m <sup>2</sup> , mean $\pm$ SD) | 24.35 $\pm$ 3.34     | 24.99 $\pm$ 2.92            | 0.13    |
| Active smoking, n (%)                   | 34 (30.1)            | 20 (39.2)                   | 0.25    |
| Hyperlipidemia, n (%)                   | 34 (30.1)            | 19 (27.3)                   | 0.36    |
| Diabetes mellitus, n (%)                | 36 (31.9)            | 16 (31.4)                   | 0.95    |
| Symptom, n (%)                          | 73 (64.6)            | 35 (68.6)                   | 0.62    |
| EFV (cm <sup>3</sup> , mean $\pm$ SD)   | 121.07 $\pm$ 35.55   | 106.98 $\pm$ 32.52          | 0.04*   |
| CAC, n (%)                              | 61 (54.0)            | 19 (37.2)                   | 0.04*   |
| Hemodynamically significant CAD, n (%)  | 52 (46.0)            | 10 (19.6)                   | 0.001*  |

\*, P for trend <0.05. EFV, epicardial fat volume; BMI, body mass index; CAC, coronary artery calcium; symptom, angina, dyspnea, atypical chest pain, and dyspnea with angina or atypical chest pain; SD, standard deviation.
